# Supplementary material for: Engineering Escherichia coli for Isobutanol Production from Xylose or Glucose–Xylose Mixture
Source: MDPI journal article supplement (doi:10.3390/microorganisms11102573), 2023-10-16
Supplement: s1 [file s1]

Supplementary materials

# Engineering *Escherichia coli* for Isobutanol Production from Xylose or Glucose–Xylose Mixture

Pengfei Gu <sup>1,\*</sup>, Fangfang Li <sup>2</sup> and Zhaosong Huang <sup>1</sup>

<sup>1</sup> School of Biological Science and Technology, University of Jinan, Jinan 250022, China; bio\_huangzs@ujn.edu.cn

<sup>2</sup> Yantai Food and Drug Control and Test Center, Yantai 264003, China; loveecoli@163.com

\* Correspondence: bio\_gupf@ujn.edu.cn

**Table S1.** Primers used in this study

| Primers         | Sequences (5'-3')                                                               |
|-----------------|---------------------------------------------------------------------------------|
| xylAB-QF        | ATTACGACATCATCCATCACCCGCGGCATTACCTGATTATGGAGT<br>TCAATGTGTAGGCTGGAGCTGCTTC      |
| xylAB-QR        | AGATATATAGATGTGAATTATCCCCACCCGGTCAGGCAGGGGAT<br>AACGTATGGGAATTAGCCATGGTCC       |
| xylAB-JF        | TTACCCAGTTTCATCATTCCA                                                           |
| xylAB-JR        | CATAGCCCAACCAGATAAACC                                                           |
| pflB-QF         | TGTCGAAGTACGCAGTAAATAAAAAATCCACTTAAGAAGGTAG<br>GTGTTACGTGTAGGCTGGAGCTGCTTC      |
| pflB-QR         | GTGGAGCCTTTATTGTACGCTTTTTACTGTACGATTTTCAGTCAAA<br>TCTAAATGGGAATTAGCCATGGTCC     |
| pflB-JF         | TGAGCACAGTATCGCAAACAT                                                           |
| pflB-JR         | ATTGCGGTGTTTCTCCAGATGTG                                                         |
| ldhA-QF         | GTAGCTTAAATGTGATTCAACATCACTGGAGAAAGTCTTGTGTA<br>GGCTGGAGCTGCTTC                 |
| ldhA-QR         | ATTGGGGATTATCTGAATCAGCTCCCCTGGAATGCAGGGGAGCG<br>GCAAGAATGGGAATTAGCCATGGTCC      |
| ldhA-JF         | ACAGCCCCGAGCGTCATCAGCAGCGTCAA                                                   |
| ldhA-JR         | ATGGTGTTATCGAGTTCATTAAGCTGCGGG                                                  |
| cbd-QF          | AACATTGCGCTTCATCTGGTGGCTGCTGATTGGCGTGATCCTGG<br>TGGTCTGTGTAGGCTGGAGCTGCTTC      |
| cbd-QR          | CCAGAGAGTGTAGAGCAACACAATGGGCAAAAATATCAGCACG<br>ATTACCAATGGGAATTAGCCATGGTCC      |
| cbd-JF          | AAATGGCGCTCTGGAGTTTG                                                            |
| cbd-JR          | CACCACACTTTCCAGCTTCA                                                            |
| cyo-cmr-NF      | GCTGGCATTATTTTGGGAGGTCTGGCGCTCGTTGGCCTGATCAC<br>TTACTTGTGTAGGCTGGAGCTGCTTC      |
| cmr-NR          | CTCTAGTAGCTAGCATAATACCTAGGACTGAGCTAGCTGTAAAAT<br>GGGAATTAGCCATGGTCC             |
| cmr-xdh-NF      | TCAGTCCTAGGTATTATGCTAGCTACTAGAGAAGGAGATATACAT<br>ATGTCCTCAGCCATCTATCCCAGCC      |
| xdh-cyo-NR      | GCATCGCAGAATGGAACACGATGCGGCCCTGATACATGGTGAAC<br>AGCCAGTCAACGCCAGCCGGCGTCGATCCAG |
| cyo-cmr-NF plus | TATCACTTGATGCAGTCCCGTTCCATGAACCTATCGTCATGGTTA<br>CGATCGCTGGCATTATTTTGGGAGG      |
| xdh-cyo-NR plus | GCCAGTCATCCCGCCACCGAGAAGGTGACGATAAAACCGATG<br>GTCCACAGCATCGCAGAATGGAACACG       |
| cyo-JF          | CAATGACGATACCTGCACCG                                                            |
| cyo-JR          | ACACGAAGGTATGGAAGGCA                                                            |
| nuo-cmr-NF      | GTGCTGGGTATTCCGGCAAGCGACGTCGAAGGTGTGGCAACGT<br>TCTACAGGTGTAGGCTGGAGCTGCTTC      |
| cmr-xylFGH-NF   | TCAGTCCTAGGTATTATGCTAGCTACTAGAGAAGGAGATATACAT                                   |

|                 |                                                                                     |
|-----------------|-------------------------------------------------------------------------------------|
|                 | ATGAAAATAAAGAACATTCTACTCA                                                           |
| xylFGH-nuo-NR   | CAAACGGCACTTGCGAACGGTGCGCAGTCGGCTGGTTGTTACC<br>TTCCATCTCAAGAACGGCGTTTGGTTG          |
| nuo-cmr-NF plus | AGAAGCAGCGTGGCTGGGTGCCGGATGGTGCGATCCACGCGAT<br>CGCCGATGTGCTGGGTATTCCGGCAAGCGACGTCGA |
| xylFGH-nuo plus | GTCTTGGAATTTGTTCCACGCCTGCGGGGAGTTCCAGCCCGGCG<br>CCCAGGCAAACGGCACTTGCGAACGGTGCGCAGTC |
| Nuo-JF          | GTCAGTCCTTCGGCGATTTC                                                                |
| Nuo-JR          | CCACAAACCGAGGCTTTTGA                                                                |
| ptsG-QF         | CACGCGTGAGAACGTAAAAAAGCACCCATACTCAGGAGCACT<br>CTCAATTGTGTAGGCTGGAGCTGCTTC           |
| ptsG-QR         | GTAAAAAAGGCAGCCATCTGGCTGCCTTAGTCTCCCCAACGTCT<br>TACGGAATGGGAATTAGCCATGGTCC          |
| ptsG-JF         | TCGCCCCGTCTGTTTCACATCG                                                              |
| ptsG-JR         | AGAGTTGACGGTCGGCGGTGGT                                                              |
| pgi-cmr-NF      | CGCTACAATCTTCCAAAGTCACAATTCTCAAAATCAGAAGAGTA<br>TTGCTAGTGTAGGCTGGAGCTGCTTC          |
| cmr-NR          | CTCTAGTAGCTAGCATAATACCTAGGACTGAGCTAGCTGTAAAAT<br>GGGAATTAGCCATGGTCC                 |
| cmr-zwf-NF      | TCAGTCCTAGGTATTATGCTAGCTACTAGAGAAGGAGATATACAT<br>ATGGCGGTAAACGCAAACAGCCCAGG         |
| zwf-pgi-NR      | GTTGCCGGATGCGGCGTGAACGCCTTATCCGGCCTACATATCGA<br>CGATGATTACTCAAACCTCATTCCAGGAACGA    |
| pgi-cmr-NF plus | CTCAACATTACGCTAACGGCACTAAAACCATCACATTTTTCTGTG<br>ACTGGCGCTACAATCTTCCAAAGTC          |
| pgi-cmr-NR plus | GCATCGACCTGTAGGCCTGATAAGACGCGACCGCGTCGCATCAG<br>GCATCGGTTGCCGGATGCGGCGTGAA          |
| pgi-JF          | TAGGATTAACCTCACGGTATG                                                               |
| pgi-JR          | ATCACAGGACTGGCTCCTCCAA                                                              |
| gnd-cmr-NF      | TCCAGGCCGCGAGCATTACGCGCGGTGATCACACCTGACAGGA<br>GTATGTAGTGTAGGCTGGAGCTGCTTC          |
| cmr-NR          | CTCTAGTAGCTAGCATAATACCTAGGACTGAGCTAGCTGTAAAAT<br>GGGAATTAGCCATGGTCC                 |
| cmr-pgl-NF      | TCAGTCCTAGGTATTATGCTAGCTACTAGAGAAGGAGATATACAT<br>ATGAAAATCACCATTTCCGGTACTG          |
| pgl-gnd-NR      | GCCCCGTGCAATATACGCCGGGCCTCAATTTTATTGTTGGTTAAA<br>TCAGATTAGTCGCTGCCAAAGAGAT          |
| gnd-cmr-NF plus | ATAAGCTATTTATACTTTAATAAGTACTTTGTATACTTATTTGCGA<br>ACATTCCAGGCCGCGAGCATTGAG          |
| pgl-gnd-NR plus | GTTAATATTAAGCAGTGAAATTTAGTCTATAAGATATTTGGCAAA<br>AAAAAGCCCCGGTGCAATATACGCCG         |
| gnd-JF          | TGGCTGGTGTGAGACTTCATT                                                               |
| gnd-JR          | GCGATTAGAAGCCCCTTTGAC                                                               |
| pta-cmr-NF      | GGTGCTGTTTTGTAACCCGCCAAATCGGCGGTAACGAAAGAGG                                         |

|                  |                                                                            |
|------------------|----------------------------------------------------------------------------|
|                  | ATAAACCGTG TAGGCTGGAGCTGCTTC                                               |
| cmr-edd-NF       | TCAGTCCTAGGTATTATGCTAGCTACTAGAGAAGGAGATATACAT<br>ATGAATCCACAATTGTTACGCGTAA |
| edd-pta-NR       | TTATTTCCGGTTCAGATATCCGCAGCGCAAAGCTGCGGATGATG<br>ACGAGATTAAAAAGTGATACAGGTTG |
| pta-cmr-NF plus  | AAGACGCGAGCCGCCTGACTGCCTGATTTACACCGCCAGCTC<br>AGCTGGCGGTGCTGTTTTGTAACCCGC  |
| edd-pta-NR plus  | ATCAGAAAGGATTAATGCAAATTAAGAGAATAAAAAACCGGAA<br>ATAGTGATTATTTCCGGTTCAGATATC |
| pta-JF           | CAATGGACGTTTACTGCCACC                                                      |
| pta-JR           | CCAGGTGGCAAGGCTGGTTAA                                                      |
| ackA-cmr-NF      | CTATGGCTCCCTGACGTTTTTTTAGCCACGTATCAATTATAGGTAC<br>TTCCGTGTAGGCTGGAGCTGCTTC |
| cmr-eda-NF       | TCAGTCCTAGGTATTATGCTAGCTACTAGAGAAGGAGATATACAT<br>ATGAAAAACTGGAAAACAAGTGCAG |
| eda-ackA-NR      | GATTTGGCGGGTTACAAAACAGCACCGCCAGCTGAGCTGGCGG<br>TGTGAAATTACAGCTTAGCGCCTTCTA |
| ackA-cmr-NF plus | TGCAGTGCATGATGTTAATCATAAATGTCGGTGTCATCATGCGCT<br>ACGCTCTATGGCTCCCTGACGTTTT |
| eda-ackA-NR plus | GGGATCAGCATAATAATACGGGACACGGTTTATCCTCTTTCGTTA<br>CCGCCGATTTGGCGGGTTACAAAAC |
| ackA-JF          | CGATTATCCGGCGTTGACATG                                                      |
| ackA-JR          | CGCACGCACGATAGTCGTAGTCTGAT                                                 |

---

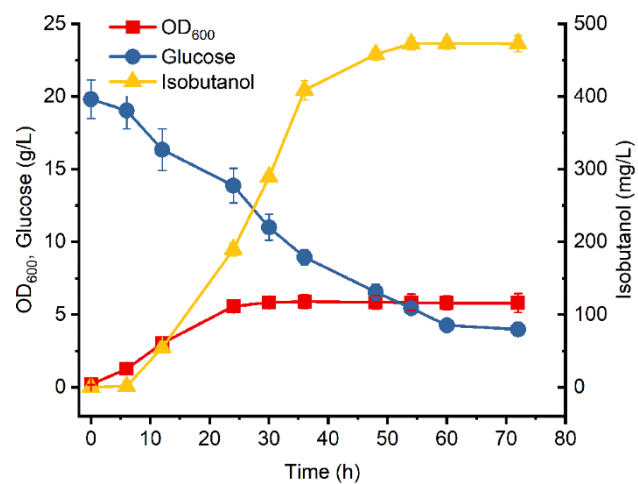

**Figure S1.** Batch fermentation of BWL9 with 20 g/L glucose as sole carbon source. The error bars represent standard deviations from three replicate fermentations.
